# Supplementary material for: Evaluation of treatment response and symptom progression in 400 patients with visual snow syndrome
Source: HighWire-hosted journal article supplement (doi:10.1136/bjophthalmol-2020-318653), 2021-10-16
Supplement: bjophthalmol-2020-318653supp001_data_supplement.pdf [file bjophthalmol-2020-318653supp001_data_supplement.pdf]

## **An evaluation of treatment response and symptom progression in four hundred patients with visual snow syndrome**

### **Supplementary material**

- Clinical criteria for the definition of VSS and online survey used for diagnosis are shown respectively in sections A and B of this supplementary material.
- The treatment questionnaire and the 30-day diary are outlined respectively in sections C and D.
- eTable1 represents the results from the binary logistic regression analysis to predict the effect of clinical VSS variables on the likelihood of having any kind of response to medication.

A) Clinical criteria for the definition of the visual snow syndrome

---

**A Visual snow: dynamic, continuous, tiny dots in the entire visual field lasting longer than 3 months.**

*The dots are usually black/grey on white background and grey/white on black background; however they can also be transparent, white flashing or coloured.*

---

**B Presence of at least two additional visual symptoms of the four following categories:**

(i) Palinopsia. At least one of the following: afterimages or trailing of moving objects.

*After images should be different from retinal afterimages, which occur only when staring at a high contrast image and are in complementary colour.*

(ii) Enhanced entoptic phenomena. At least one of the following: excessive floaters in both eyes, excessive blue field entoptic phenomenon, self-light of the eye, or spontaneous photopsia.

*Entoptic phenomena arise from the structure of the visual system itself. The blue field entoptic phenomenon is described as uncountable little grey/white/black dots or rings shooting over visual field in both eyes when looking at homogeneous bright surfaces, such as the blue sky; self-light of the eye is described as coloured waves or clouds when closing the eyes in the dark; spontaneous photopsia is characterized by bright flashes of light.*

(iii) Photophobia.

(iv) Nyctalopia.

---

**C Symptoms are not consistent with typical migraine visual aura.**

*As defined by the International Headache Society in the International Classification of Headache Disorders [12].*

---

**D Symptoms are not better explained by another disorder.**

*Normal ophthalmology tests (best corrected visual acuity, dilated fundus exam, visual field and electroretinogram); not caused by previous intake of psychotropic drugs.*

---

## B) Online survey

---

Name

Address

Date of Birth (Day/Month/Year)

Telephone number

---

1) Please make a brief statement that you are willing to be contacted for research. This is a European data protection issue. example: "Yes, please keep my contact details and you may contact me for research purposes."

---

2) Brief description of all symptoms you relate to visual snow syndrome.

---

3) Date or age when your symptoms started.

---

4) Visual snow: what type

- black and white (i.e. only black dots on white background, white dots on black background)
  - clear (i.e. colour of the background)
  - flashing (i.e. always white, brighter than background)
  - coloured
  - all of these
- 

5) Other symptoms (please only answer yes or no)

- After images
  - Trailing of images in the vision
  - Blue field entoptic phenomenon (i.e. white squiggly lines moving pulsating on the blue sky)
  - Floaters in vision
  - Coloured clouds or waves with eyes closed
  - Flashes of light
  - Impaired night vision
  - Sensitive to light
  - Tinnitus
- 

6) Have you ever been diagnosed with migraine or have you had a headache of moderate or severe intensity in the past? ( Please answer yes or no)

---

7) Have you ever taken any illicit drugs in the past?

---

## C) Treatment questionnaire.

| Drug name                                 | Brand name (examples)                          | Effect | Symptom | Please describe effect here |
|-------------------------------------------|------------------------------------------------|--------|---------|-----------------------------|
| Topiramate                                | Topamax, Sincronil, Acomicil, Neutop           |        |         |                             |
| Gabapentin                                | Neurontin, Alpentin, Gabagamma, Dineurin       |        |         |                             |
| Valproic acid                             | Depakin, Depakote, Epilim, Divalproex, Orfiril |        |         |                             |
| Lamotrigine                               | Lamictal, Lamotrix, Lafigin, Lambipol          |        |         |                             |
| Pregabalin                                | Lyrica, Maertesia, Pagadin                     |        |         |                             |
| <i>Other antiepileptics</i>               |                                                |        |         |                             |
| Sertraline                                | Zoloft, Setrax, Serlift, Serenata, Asentra     |        |         |                             |
| Fluoxetine                                | Prozac, Sarafem, Fluxen, Deprex                |        |         |                             |
| Amitriptyline                             | Elavil, Laroxyll, Endep                        |        |         |                             |
| Nortriptyline                             | Aventyl, Pamelor                               |        |         |                             |
| <i>Other antidepressants</i>              |                                                |        |         |                             |
| Lorazepam                                 | Ativan, Temesta, Lorans                        |        |         |                             |
| Clonazepam                                | Klonopin, Rivotril, Clonex                     |        |         |                             |
| Alprazolam                                | Xanax, Zolam, Kalma, Restyl                    |        |         |                             |
| <i>Other anxiety or sleep medications</i> |                                                |        |         |                             |
| Sumatriptan                               | Imigran, Imitrex, Sumavel                      |        |         |                             |
| Eletriptan                                | Relpax                                         |        |         |                             |
| <i>Other triptans</i>                     |                                                |        |         |                             |
| Methylprednisolone                        | Solu-Medrol, Depo-Medrol, Medrol               |        |         |                             |
| Prednisolone                              | Deltacortril, Deltasone, Pred Forte,           |        |         |                             |
| <i>Other steroids or pain medications</i> |                                                |        |         |                             |
| Doxycycline                               | Acticlate, Adoxa, Hydrodoxx, Oraxyl            |        |         |                             |
| Sulfamethoxazole and trimethoprim         | Bactrim, Septrin, Cotrim                       |        |         |                             |
| Amoxicillin                               | Augmentin, Amoxil, Trimox                      |        |         |                             |
| Metronidazole                             | Flagyl, Gynotran, Noritate, Rozex              |        |         |                             |
| <i>Other antibiotics or antifungals</i>   |                                                |        |         |                             |
| Atomoxetine                               | Strattera, Abretia                             |        |         |                             |
| <i>Other ADHD treatments</i>              |                                                |        |         |                             |
| Propranolol                               | Inderal, Innopran                              |        |         |                             |
| Verapamil                                 | Calan, Isoptin, Verelan                        |        |         |                             |
| <i>Other antihypertensive treatments</i>  |                                                |        |         |                             |
| Vitamins and other supplements            |                                                |        |         |                             |
| Metoclopramide                            |                                                |        |         |                             |
| <i>Other</i>                              |                                                |        |         |                             |

## D) 30-day diary of visual snow.

| <b>A - Static Density</b><br>Check only one                                                 |                          | <b>B - Static Speed</b><br>Check only one                               |                                        |                                           |                          |
|---------------------------------------------------------------------------------------------|--------------------------|-------------------------------------------------------------------------|----------------------------------------|-------------------------------------------|--------------------------|
| 0 - No static.                                                                              | <input type="checkbox"/> | 0 - Not recognizable                                                    | <input type="checkbox"/>               |                                           |                          |
| 1 - Minimal static (very thin distribution of dots). Does not mask vision.                  | <input type="checkbox"/> | 1 - Almost still                                                        | <input type="checkbox"/>               |                                           |                          |
| 2 - Minimal to moderate static (faint distribution of dots). Slight masking of vision.      | <input type="checkbox"/> | 2 - Slow                                                                | <input type="checkbox"/>               |                                           |                          |
| 3 - Moderate static. Some masking of vision.                                                | <input type="checkbox"/> | 3 - Moderate                                                            | <input type="checkbox"/>               |                                           |                          |
| 4 - Strong static. Substantial masking of vision. Still able to see through.                | <input type="checkbox"/> | 4 - Rapid                                                               | <input type="checkbox"/>               |                                           |                          |
| 5 - Very strong static. Distracting masking of vision. Barely able to see through.          | <input type="checkbox"/> |                                                                         |                                        |                                           |                          |
| 6 - Extreme static, not able to see through.                                                | <input type="checkbox"/> |                                                                         |                                        |                                           |                          |
| <b>C - Surface dependence</b><br>Check only one                                             |                          | <b>D - Distraction</b><br>Check only one                                |                                        | <b>E - Time course</b><br>Check only one  |                          |
| 0 - Cannot be seen on any surface.                                                          | <input type="checkbox"/> | 0 - Impossible to notice.                                               | <input type="checkbox"/>               | 0 - Not present                           | <input type="checkbox"/> |
| 1 - Can be seen on few surface.                                                             | <input type="checkbox"/> | 1 - Able to see if concentrating.                                       | <input type="checkbox"/>               | 1 - Present occasionally (< 8 hrs/d)      | <input type="checkbox"/> |
| 2 - Can be seen on many surfaces.                                                           | <input type="checkbox"/> | 2 - Able to see without concentrating. Can be ignored most of the time. | <input type="checkbox"/>               | 2 - Present most of the time (8-16 hrs/d) | <input type="checkbox"/> |
| 3 - Can be seen on most, but not all surfaces.                                              | <input type="checkbox"/> | 3 - Able to see without concentrating. Can be ignored sometimes.        | <input type="checkbox"/>               | 3 - Present almost always (16-24 hrs/d)   | <input type="checkbox"/> |
| 4 - Can be seen on all surfaces.                                                            | <input type="checkbox"/> | 4 - Able to see without concentrating. Cannot be ignored.               | <input type="checkbox"/>               | 4 - Continuous presence                   | <input type="checkbox"/> |
| <b>F - Colour</b><br>Check only one                                                         |                          |                                                                         | <b>G - Size</b><br>Check only one      |                                           |                          |
| 1 - Black and white (only black dots on white background or white dots on black background) |                          |                                                                         | <input type="checkbox"/> 1 - Tiny      |                                           |                          |
| 2 - Transparent (colour of the background)                                                  |                          |                                                                         | <input type="checkbox"/> 2 - Small     |                                           |                          |
| 3 - Flashing (always white, brighter than background)                                       |                          |                                                                         | <input type="checkbox"/> 3 - Medium    |                                           |                          |
| 4 - Coloured                                                                                |                          |                                                                         | <input type="checkbox"/> 4 - Large     |                                           |                          |
| 5 - Other (please explain briefly, try to use singular descriptors or adjectives)           |                          |                                                                         | <input type="checkbox"/> 5 - Pixelated |                                           |                          |

**H - Lighting conditions**

**please rate from 1 to 7, with 1 being the worst condition and 7 the best (only rate once)**

Outdoor: sunny day

Outdoor: cloudy day

Outdoor: rainy day

Indoor (interior light only)

Fluorescent lighting

Outdoor: night-time

|                               | Day 1 | Day 2 | Day 3 | Day 4 | Day 5 | Day 6 | Day 7 | Day 8 | Day 9 | Day 10 |
|-------------------------------|-------|-------|-------|-------|-------|-------|-------|-------|-------|--------|
| <b>Date</b>                   |       |       |       |       |       |       |       |       |       |        |
| <b>A - Static Density</b>     |       |       |       |       |       |       |       |       |       |        |
| <b>B - Static Speed</b>       |       |       |       |       |       |       |       |       |       |        |
| <b>C - Surface dependence</b> |       |       |       |       |       |       |       |       |       |        |
| <b>D - Distraction</b>        |       |       |       |       |       |       |       |       |       |        |
| <b>E - Time course</b>        |       |       |       |       |       |       |       |       |       |        |
| <b>F - Colour</b>             |       |       |       |       |       |       |       |       |       |        |
| <b>G - Size</b>               |       |       |       |       |       |       |       |       |       |        |

|                               | Day 11 | Day 12 | Day 13 | Day 14 | Day 15 | Day 16 | Day 17 | Day 18 | Day 19 | Day 20 |
|-------------------------------|--------|--------|--------|--------|--------|--------|--------|--------|--------|--------|
| <b>Date</b>                   |        |        |        |        |        |        |        |        |        |        |
| <b>A - Static Density</b>     |        |        |        |        |        |        |        |        |        |        |
| <b>B - Static Speed</b>       |        |        |        |        |        |        |        |        |        |        |
| <b>C - Surface dependence</b> |        |        |        |        |        |        |        |        |        |        |
| <b>D - Distraction</b>        |        |        |        |        |        |        |        |        |        |        |
| <b>E - Time course</b>        |        |        |        |        |        |        |        |        |        |        |
| <b>F - Colour</b>             |        |        |        |        |        |        |        |        |        |        |
| <b>G - Size</b>               |        |        |        |        |        |        |        |        |        |        |

|                               | Day 21 | Day 22 | Day 23 | Day 24 | Day 25 | Day 26 | Day 27 | Day 28 | Day 29 | Day 30 |
|-------------------------------|--------|--------|--------|--------|--------|--------|--------|--------|--------|--------|
| <b>Date</b>                   |        |        |        |        |        |        |        |        |        |        |
| <b>A - Static Density</b>     |        |        |        |        |        |        |        |        |        |        |
| <b>B - Static Speed</b>       |        |        |        |        |        |        |        |        |        |        |
| <b>C - Surface dependence</b> |        |        |        |        |        |        |        |        |        |        |
| <b>D - Distraction</b>        |        |        |        |        |        |        |        |        |        |        |
| <b>E - Time course</b>        |        |        |        |        |        |        |        |        |        |        |
| <b>F - Colour</b>             |        |        |        |        |        |        |        |        |        |        |
| <b>G - Size</b>               |        |        |        |        |        |        |        |        |        |        |

INSTRUCTIONS: Please score each symptom from A to G, on a daily basis.  
Please indicate your start (\_\_/\_\_/20\_\_) and end date (\_\_/\_\_/20\_\_).

eTable 1. Binary logistic regression analysis results for prediction of no response to medication vs. any response to medication. OR = odds ratio; CI = 95% confidence interval.

|              | OR   | CI          | P value |
|--------------|------|-------------|---------|
| Age          | 1.00 | 0.98 – 1.02 | 0.89    |
| Male gender  | .87  | 0.54 – 1.41 | 0.57    |
| Age of onset | 1.02 | 1.01 – 1.04 | 0.01    |
| Tinnitus     | 1.31 | 0.74 – 2.33 | 0.36    |
| Migraine     | 1.11 | 0.64 – 1.93 | 0.71    |
